# Supplementary material for: Proteotyping of Campylobacter jejuni by MALDI-TOF MS and Strain Solution Version 2 Software
Source: MDPI journal article supplement (doi:10.3390/microorganisms11010202), 2023-01-12
Supplement: s1 [file s1]

## Supplementary Material

**Supplementary Table S1.** DNA primers used for MLST

| Primer name   | Sequence (5'→3')         | Target           | Gene                                            | Purpose                    |
|---------------|--------------------------|------------------|-------------------------------------------------|----------------------------|
| Cj_aspA_A9-F  | AGTACTAATGATGCTTATCC     | <i>C. jejuni</i> | <i>aspA</i> (aspatase)                          | amplification              |
| Cj_aspA_A10-R | ATTCATCAATTTGTTCTTTGC    |                  |                                                 |                            |
| Cj_glnA_A1-F  | TAGGAACCTGGCATCATATTACC  |                  | <i>glnA</i> (glutamine synthetase)              |                            |
| Cj_glnA_A2-R  | TTGGACGAGCTTCTACTGGC     |                  |                                                 |                            |
| Cj_gltA_A1-F  | GGGCTTGACTTCTACAGCTACTTG |                  | <i>gltA</i> (citrate synthase)                  |                            |
| Cj_gltA_A2-R  | CCAAATAAAGTTGTCTTGGACGG  |                  |                                                 |                            |
| Cj_glyA_A1-F  | GAGTTAGAGCGTCAATGTGAAGG  |                  | <i>glyA</i> (serine hydroxy methyl transferase) |                            |
| Cj_glyA_A2-R  | AAACCTCTGGCAGTAAGGGC     |                  |                                                 |                            |
| Cj_pgm_A7-F   | TACTAATAATATCTTAGTAGG    |                  | <i>pgm</i> (phospho glucomutase)                |                            |
| Cj_pgm_A8-R   | CACAACATTTTTCATTTCTTTTC  |                  |                                                 |                            |
| Cj_tkt_A3-F   | GCAAACCTCAGGACACCCAGG    |                  | <i>tkt</i> (transketolase)                      |                            |
| Cj_tkt_A6-R   | AAAGCATTGTTAATGGCTGC     |                  |                                                 |                            |
| Cj_uncA_A7-F  | ATGGACTTAAGAATATTATGGC   |                  | <i>uncA</i> (ATP synthase alpha subunit)        |                            |
| Cj_uncA_A8-R  | ATAAATTCCATCTTCAAATTCC   |                  |                                                 |                            |
| Cj_aspA_S3-F  | CCAACCTGCAAGATGCTGTACC   |                  | <i>aspA</i> (aspatase)                          | sequencing                 |
| Cj_aspA_S6-R  | TTCATTTGCGGTAATACCATC    |                  |                                                 |                            |
| Cj_glnA_S3-F  | CATGCAATCAATGAAGAAAC     |                  | <i>glnA</i> (glutamine synthetase)              |                            |
| Cj_glnA_S6-R  | TTCATAAGCTCATATGAAC      |                  |                                                 |                            |
| Cj_gltA_S3-F  | CTTATATTGATGGAGAAAATGG   |                  | <i>gltA</i> (citrate synthase)                  |                            |
| Cj_gltA_S6-R  | CCAAAGCGCACCAATACCTG     |                  |                                                 |                            |
| Cj_glyA_S5-F  | GCTAATCAAGGTGTTTATAT     |                  | <i>glyA</i> (serine hydroxy methyl transferase) |                            |
| Cj_glyA_S7-F  | AGCCTAATTCAGGTTCTCAA     |                  |                                                 |                            |
| Cj_glyA_S4-R  | AGGTGATTATCCGTTCCATCGC   |                  | <i>pgm</i> (phospho glucomutase)                |                            |
| Cj_pgm_S5-F   | GGTTTTAGATGTGGCTCATG     |                  |                                                 |                            |
| Cj_pgm_S2-R   | TCCAGAATAGCGAAATAAGG     |                  | <i>tkt</i> (transketolase)                      |                            |
| Cj_tkt_S5-F   | GCTTAGCAGATATTTTAAGTG    |                  |                                                 |                            |
| Cj_tkt_S6-R   | AAGCCTGCTTGTTCTTTGGC     |                  | <i>uncA</i> (ATP synthase alpha subunit)        |                            |
| Cj_uncA_S3-F  | AAAGTACAGTGGCACAAGTGG    |                  |                                                 |                            |
| Cj_uncA_S4-R  | TGCCTCATCTAAATCACTAGC    |                  | <i>aspA</i> (aspatase)                          | amplification & sequencing |
| Aspcoli S1    | CAACTTCAAGATGCAGTACC     |                  |                                                 |                            |
| Aspcoli S2    | ATCTGCTAAAGTATGCATTGC    | <i>C. coli</i>   | <i>glnA</i> (glutamine synthetase)              |                            |
| Glncoli S1    | TTCATGGATGGCAACCTATTG    |                  |                                                 |                            |
| Glncoli S2    | GCTTTGGCATAAAAGTTGCAG    |                  | <i>gltA</i> (citrate synthase)                  |                            |
| Gltcoli S1    | GATGTAGTGCATCTTTTACTC    |                  |                                                 |                            |
| Gltcoli S2    | AAGCGCTCCAATACCTGCTG     |                  |                                                 |                            |

---

|            |                        |                                                 |
|------------|------------------------|-------------------------------------------------|
|            |                        | <i>glyA</i> (serine hydroxy methyl transferase) |
| Glycoli S1 | TCAAGGCGTTTATGCTGCAC   |                                                 |
| Glycoli S2 | CCATCACTTACAAGCTTATAC  |                                                 |
| Pgmcoli S1 | TTATAAGGTAGCTCCGACTG   | <i>pgm</i> (phospho glucomutase)                |
| Pgmcoli S2 | GTTCCGAATAGCGAAATAACAC |                                                 |
| Tktcoli S1 | AGGCTTGTTGTTTCAGGCGG   | <i>tkt</i> (transketolase)                      |
| Tktcoli S2 | TGACTTCCTTCAAGCTCTCC   |                                                 |
| Unccoli S1 | AAGCACAGTGGCTCAAGTTG   | <i>uncA</i> (ATP synthase alpha subunit)        |
| Unccoli S2 | CTACTTGCCTCATCCAATCAC  |                                                 |

---

**Supplementary Table S2.** DNA primers used for sequencing of biomarkers

| Primer Name   |       | Sequence                          |
|---------------|-------|-----------------------------------|
| Cam-S10       | F     | GGAAAGAATYAGGCTTAAGCTAAAAGCTTA    |
|               | R     | TCCGGTGCWAGWGAWACRATYTCATA        |
|               | 1     | GGAATAYATYGTAGAAAAAATHGGHATGAG    |
|               | 2r    | TACCTGGYTGAACRCGACCTG             |
|               | 3     | GTGGTGGTAAAAARCCWGGAGACAA         |
|               | 4     | GGACCAAADGCWACHGCRCC              |
|               | 5     | ATATACTCCAAGYAGAAGATWTATBACAGG    |
|               | 6     | CCVGTTTATRTHACWGAAAAATCAYATMGG    |
|               | 7r    | TCTWGCYTTWGTGGAGATARTCTTATGAA     |
|               | 8     | ATAGAAAYTGGGARTCWAGATGGTTTCC      |
|               | 9     | CTTATGGHAAATAGGDRTWAAAGTDTGGAT    |
|               | 10    | AAAAGCTAAAAACWATGCARCTWACTAAYCC   |
|               | New-F | CTTGGTATGTTGAAGCGGG               |
|               | New-R | CAAAGATACGAGTTCCGATAG             |
| Cam-spc       | F     | ATGTGTATYAARGTTTTAGGBGGTAGYAAA    |
|               | R     | AATTTGAGCYTCDATYTTTCTCATYGTRTC    |
|               | 1     | GARITTTGATATHAAAAAYCCTATGCTTATMCC |
|               | 2     | CAATGATWGCAAAAGCDGCMCGCAA         |
|               | 3     | GCWTATTGGGGAACCTAYAGAGCTTTA       |
|               | 4r    | TTAGATGTYTTRCCRGCTTTGCGKAT        |
|               | 5     | AATTTGAAGAAGTAATCGTCGAYATCGG      |
|               | 6r    | ATTRACSCCMGGWACTGGMACATAA         |
| Cam- $\alpha$ | F     | AAAGTHGAACTHACRCCHTATAGYCTTGA     |
|               | R     | AGCCRCGCATRCTATCRAATTCATG         |
|               | 1     | TAAGYGAAGATGARGCHGCDGCTAT         |
|               | 2r    | CCTTTTCTRTGTCTTAAGCCTCTAWAGC      |
|               | 3     | GAGGACCAGTWGARAAATTAGAAAGACG      |
| Cam-S15       | F     | GATCAACAAAGCGTAGAATA              |
|               | R     | CGCTAGCTTTGGTAAATAGC              |
| Cam_L7L12     | F     | GTTGCAGATGTTGCTAAGG               |
|               | R     | GTCAAACCTCTTCCATGC                |
| Cam_L32       | F     | CTTTTTCGAAGTGATGGTAT              |
|               | R     | ATTTCCCACTAAGATAGC                |
